# Supplementary material
Source: publisher figshare collection journal article supplement (https://frontiersin.figshare.com/ndownloader/files/14529020)

## *Supplementary Material*

### **Timing of sandeel spawning and hatching off the east coast of Scotland**

**Alan MacDonald<sup>1</sup>, Michael R. Heath<sup>1</sup>, Simon P.R. Greenstreet<sup>2</sup>, Douglas C. Speirs<sup>1</sup>**

<sup>1</sup>Department of Mathematics & Statistics, University of Strathclyde, Glasgow, UK

<sup>2</sup>Marine Scotland Science, Marine Laboratory, Aberdeen, UK

**\*Correspondence:**

Alan MacDonald

Department of Mathematics & Statistics, University of Strathclyde, Glasgow, UK,  
[alan.macdonald@strath.ac.uk](mailto:alan.macdonald@strath.ac.uk)

**Keywords: *Ammodytes marinus*<sup>1</sup>, fish<sup>2</sup>, larvae<sup>3</sup>, spawning<sup>4</sup>, hatchings<sup>5</sup>, growth<sup>6</sup>, length<sup>7</sup>, 0-group**

**8**

## **FIGURE CAPTIONS**

Figure S1: Bootstrap estimates of the uncertainty in predicted hatch and spawning days. Each box-and-whisker plot shows the extremes (whiskers), quartiles (box) and median (horizontal line) of the estimated values for each year, as a consequence of imposing normally distributed variability in annual average growth rates.

## **TABLE CAPTIONS**

Table S1: Bootstrap estimates of the uncertainty in predicted hatch and spawning days. Shown is the average interquartile range (days) of the estimated values for each hatch or spawning day between 2000 and 2009, as a consequence of imposing normally distributed variability in annual average growth rates.

**TABLES**

Table S1.

| Hatch start interval | Hatch median interval | Hatch end interval | Spawning start interval | Spawning end interval |
|----------------------|-----------------------|--------------------|-------------------------|-----------------------|
| 1                    | 1.5                   | 1.5                | 0.9                     | 1.5                   |

**FIGURES**

Figure S1.

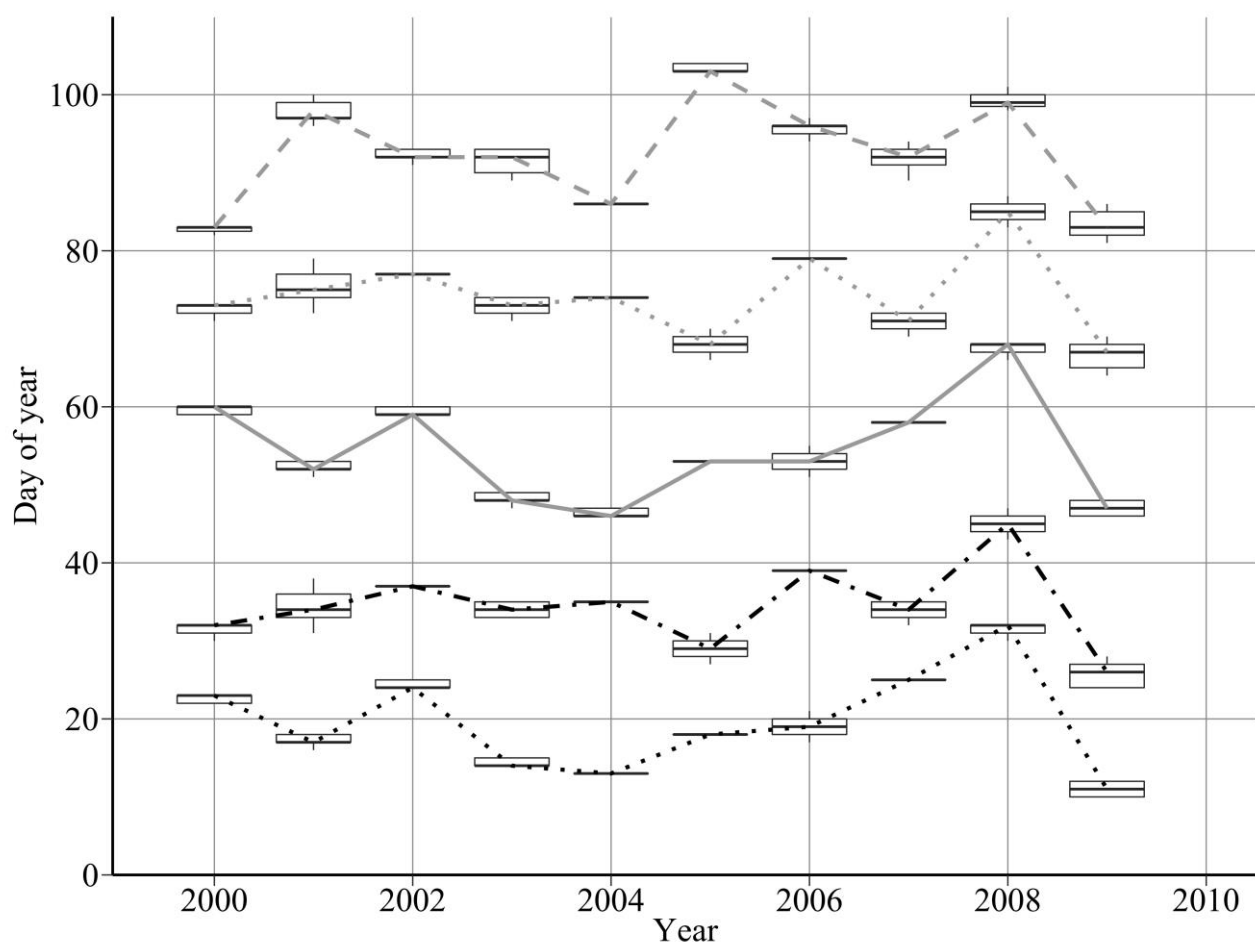

Supplement: Supplementary file 1 [file 14529020]
